# Supplementary material for: Differentiating aliphatic and aromatic alcohols using triazine-based supramolecular organogelators: end group-specific selective gelation with chain length of alcohols
Source: Royal Society of Chemistry journal article supplement (doi:10.1039/d4sm00017j), 2024-01-01
Supplement: d4sm00017j1.pdf [file d4sm00017j1.pdf]

## ELECTRONIC SUPPLEMENTARY INFORMATION

# **Differentiating aliphatic and aromatic alcohols by Triazine-based Supramolecular Organogelators: End Group Specific Selective Gelation with Chain Length of Alcohols**

Priya Paul,<sup>a</sup> Subhajit Saha<sup>a</sup> and Kumar Biradha\*<sup>a</sup>

**a. Department of Chemistry, Indian Institute of Technology Kharagpur, Kharagpur, 721302, India. E-mail: [kbiradha@chem.iitkgp.ac.in](mailto:kbiradha@chem.iitkgp.ac.in).**

## **Contents**

- 1. Experimental Section**
- 2.  $^1\text{H}$  NMR Spectra**
- 3. Inverted Vial Test images**
- 4. FESEM Images**
- 5. Rheological Parameters**
- 6. TEM Images**
- 7. Rheological parameter and Inverted Vial Test for degelation studies**
- 8. Crystal structure description**
- 9. PXRD Plot**

## 1. Experimental Section

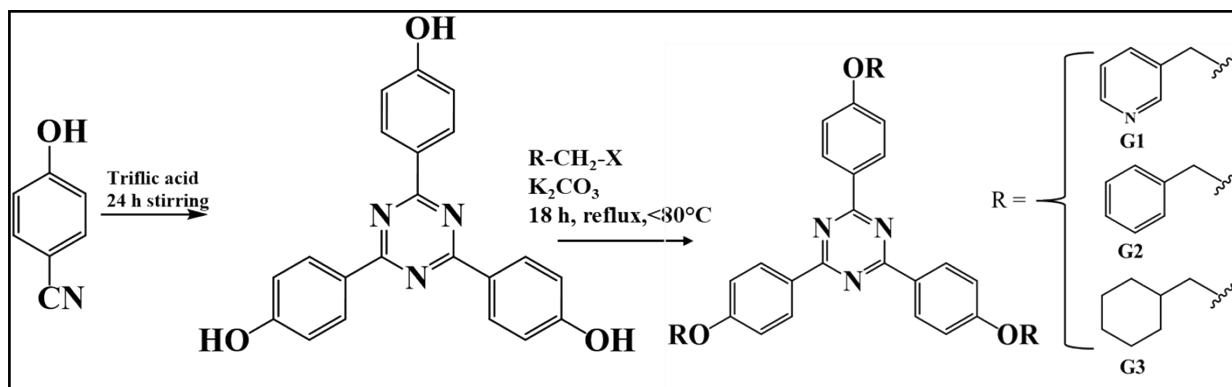

Scheme S1. Experimental protocol of gelators G1, G2 and G3

The gelators were prepared in two steps, starting from 4-cyanophenol, according to the reported literature. First 2,4,6-triazinetriphenol was prepared<sup>1</sup> and then it was subjected to a S<sub>N</sub>2 reaction<sup>2</sup> to produce the final product.

### Synthesis of 2,4,6-triazinetriphenol:

Trifluoromethanesulfonic acid (12.18 mmol) was slowly added to a stirred solution of 4-cyanophenol (4.2 mmol) in DCM at 0 °C under a N<sub>2</sub> atmosphere. Then it was allowed to come to room temperature. After stirring for next 24 h, solvent was evaporated and ice-cold water was poured into it to obtain white precipitate. Then it was neutralized by adding ammonia solution. The precipitate was filtered, washed with water and dried to obtain the product as white powder (Yield- 96%).<sup>1</sup>

### Synthesis of Gelator G1

A mixture of 2,4,6-Triazinetriphenol (10 mmol) and K<sub>2</sub>CO<sub>3</sub> (60 mmol) was taken in a two neck RB in presence of dry DMF solvent and heated for at least half an hour at 80 °C. After this 3-chloromethyl pyridine (50 mmol) was added into this reaction mixture and the entire solution was refluxed at 80 °C for 12 hrs. The reaction was thereafter quenched by adding water and leading to the formation of a white precipitate. The precipitate was filtered and washed thoroughly with water and then dried under vacuum. (Yield- 68%).

### Synthesis of Gelator G2

A mixture of 2,4,6-triazinetriphenol (10 mmol) and K<sub>2</sub>CO<sub>3</sub> (60 mmol) was taken in a two neck RB in presence of dry DMF solvent and heated for at least half an hour at 80 °C. After this

benzyl chloride (50 mmol) was added into this reaction mixture and the entire solution was refluxed at 80 °C for 12 hrs. The reaction was thereafter quenched by adding water and leading to the formation of a white precipitate. The precipitate was filtered and washed thoroughly with water and then dried under vacuum. (Yield-98%)

### Synthesis of Gelator G3

A mixture of 2,4,6-triazinetriphenol (10 mmol) and K<sub>2</sub>CO<sub>3</sub> (60 mmol) was taken in a two neck RB in presence of dry DMF solvent and heated for at least half an hour at 80 °C. After this (bromomethyl)cyclohexane (50 mmol) was added into this reaction mixture and the entire solution was refluxed at 80 °C for 12 hrs. The reaction was thereafter quenched by adding water and leading to the formation of a white precipitate. The precipitate was filtered and washed thoroughly with water and then dried under vacuum. (Yield-89%)

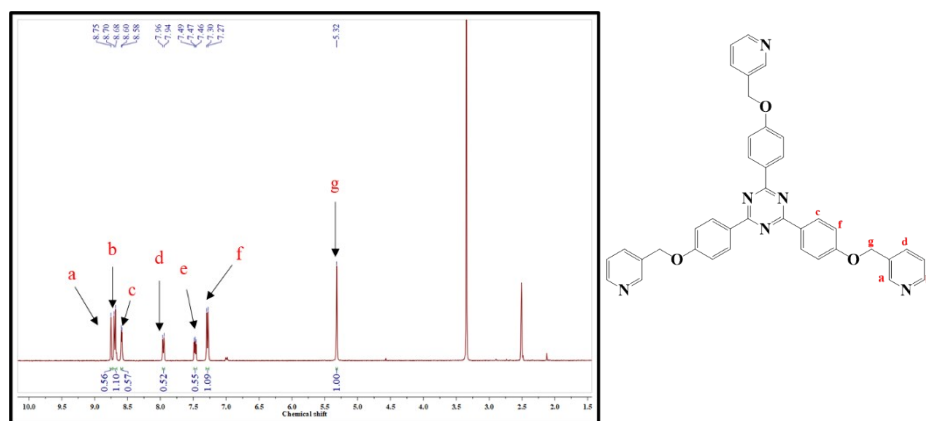

Fig. S1 <sup>1</sup>H NMR of gelator G1

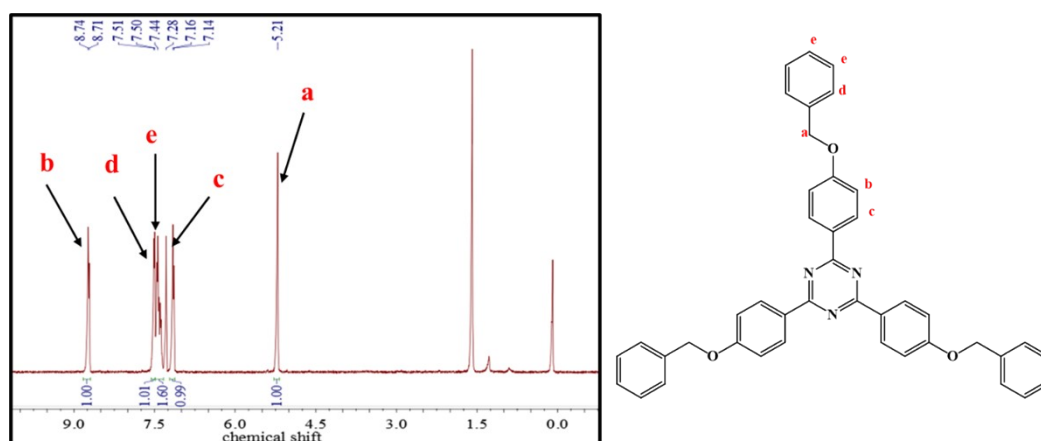

Fig. S2 <sup>1</sup>H NMR of gelator G2

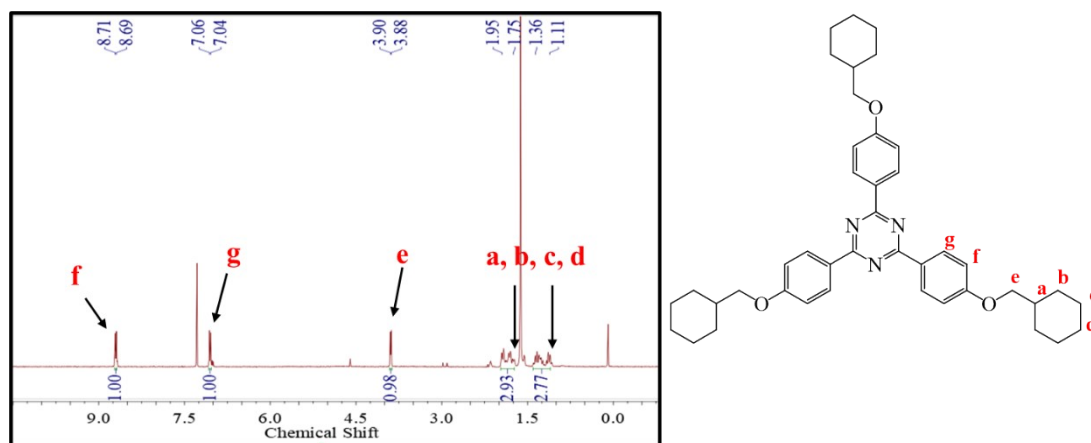

Fig. S3 <sup>1</sup>H NMR of gelator G3

Table S1. Behaviour of G1, G2 and G3 over a series of solvents and MGC and T<sub>gel</sub> values where gel formation occurs

| Class of Solvent  | Solvent System    | G1(MGC)/ T <sub>gel</sub> (°C) | G2(MGC)/ T <sub>gel</sub> (°C) | G3(MGC)/ T <sub>gel</sub> (°C) |
|-------------------|-------------------|--------------------------------|--------------------------------|--------------------------------|
| Non-polar         | Hexane            | I                              | I                              | I                              |
|                   | Cyclohexane       | I                              | S                              | I                              |
|                   | DCM               | PS                             | S                              | S                              |
|                   | CHCl <sub>3</sub> | PS                             | S                              | S                              |
| Polar Aprotic     | ACN               | PS                             | I                              | I                              |
|                   | Acetone           | PS                             | I                              | I                              |
|                   | DMF               | S                              | S                              | S                              |
|                   | DMSO              | S                              | S                              | S                              |
|                   | DMA               | S                              | S                              | PS                             |
| Polar Protic      | H <sub>2</sub> O  | I                              | I                              | I                              |
| Aliphatic alcohol | Methanol          | PS                             | I                              | I                              |
|                   | Ethanol           | G(6)/50                        | I                              | I                              |
|                   | Propanol          | G(6)/72                        | I                              | I                              |
|                   | Isopropanol       | G(6)/65                        | I                              | PS                             |
|                   | Allylic alcohol   | S                              | I                              | PS                             |
|                   | Butanol           | G(7)/80                        | I                              | G(6)/75                        |
|                   | 2-butanol         | G(7)/69                        | I                              | PS                             |
|                   | t-butanol         | G(8)/54                        | I                              | PS                             |
|                   | 1-pentanol        | S                              | PS                             | G(6)/87                        |
|                   | 1-hexanol         | S                              | S                              | G(8)/102                       |
|                   | 1-heptanol        | PS                             | G(8)/110                       | G(8)/130                       |
|                   | 1-octanol         | PS                             | G(10)/116                      | P                              |
|                   | 1-decanol         | PS                             | G(10)/128                      | P                              |
|                   | 3-butene-2-ol     | PS                             | PS                             | P                              |
| Cyclohexanol      | G(15)/72          | G(8)/96                        | G(6)/78                        |                                |

|                       |                 |          |    |   |
|-----------------------|-----------------|----------|----|---|
| Aliphatic polyalcohol | Ethylene glycol | G(6)/105 | PS | I |
|                       | 1,4-butandiol   | G(5)/100 | PS | I |
|                       | Glycerol        | PS       | PS | I |
| Aromatic alcohols     | Phenol          | S        | S  | S |
|                       | Benzyl alcohol  | S        | P  | S |

N.B. I- insoluble, P-Precipitate, PS-partially soluble, S- Clear solution, G-Gel

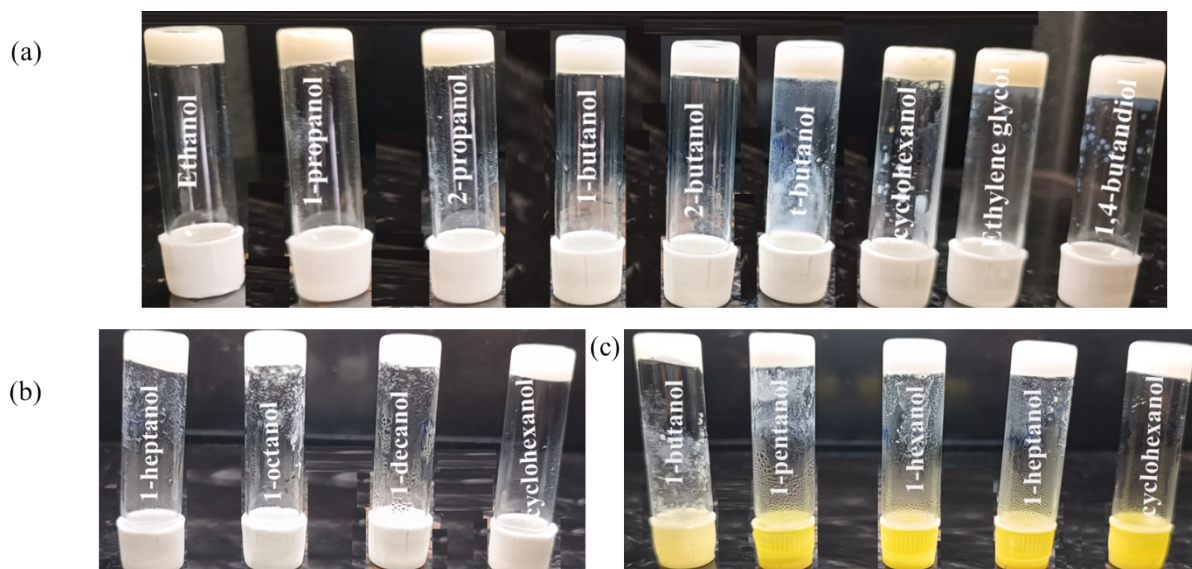

**Fig. S4.** Inverted vial picture of gels from different alcoholic solution for (a) G1 (b) G2 (c) G3

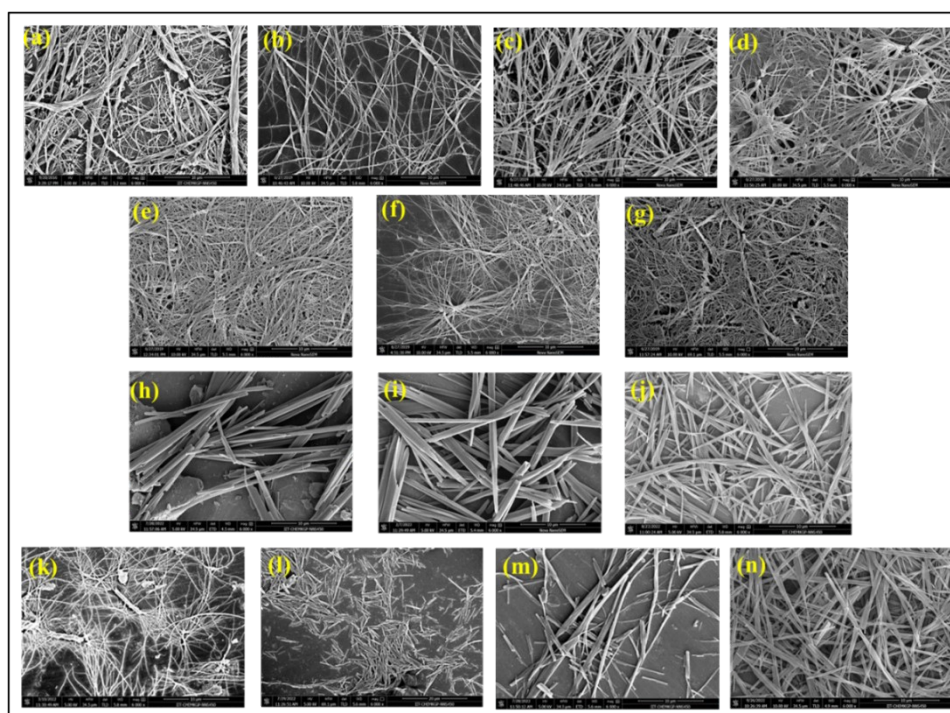

**Fig. S5** FESEM images of (a) G1\_ethanol (b) G1\_ethylene glycol (c) G1\_1,4-butandiol (d) G1\_cyclohexanol (e) G1\_1-butanol (f) G1\_2-butanol (g) G1\_t-butanol (h) G2\_cyclohexanol (i) G2\_1-decanol (j) G2\_1-heptanol (k) G2\_1-octanol (l) G3\_1-butanol (m) G3\_1-hexanol (n) G3\_cyclohexanol

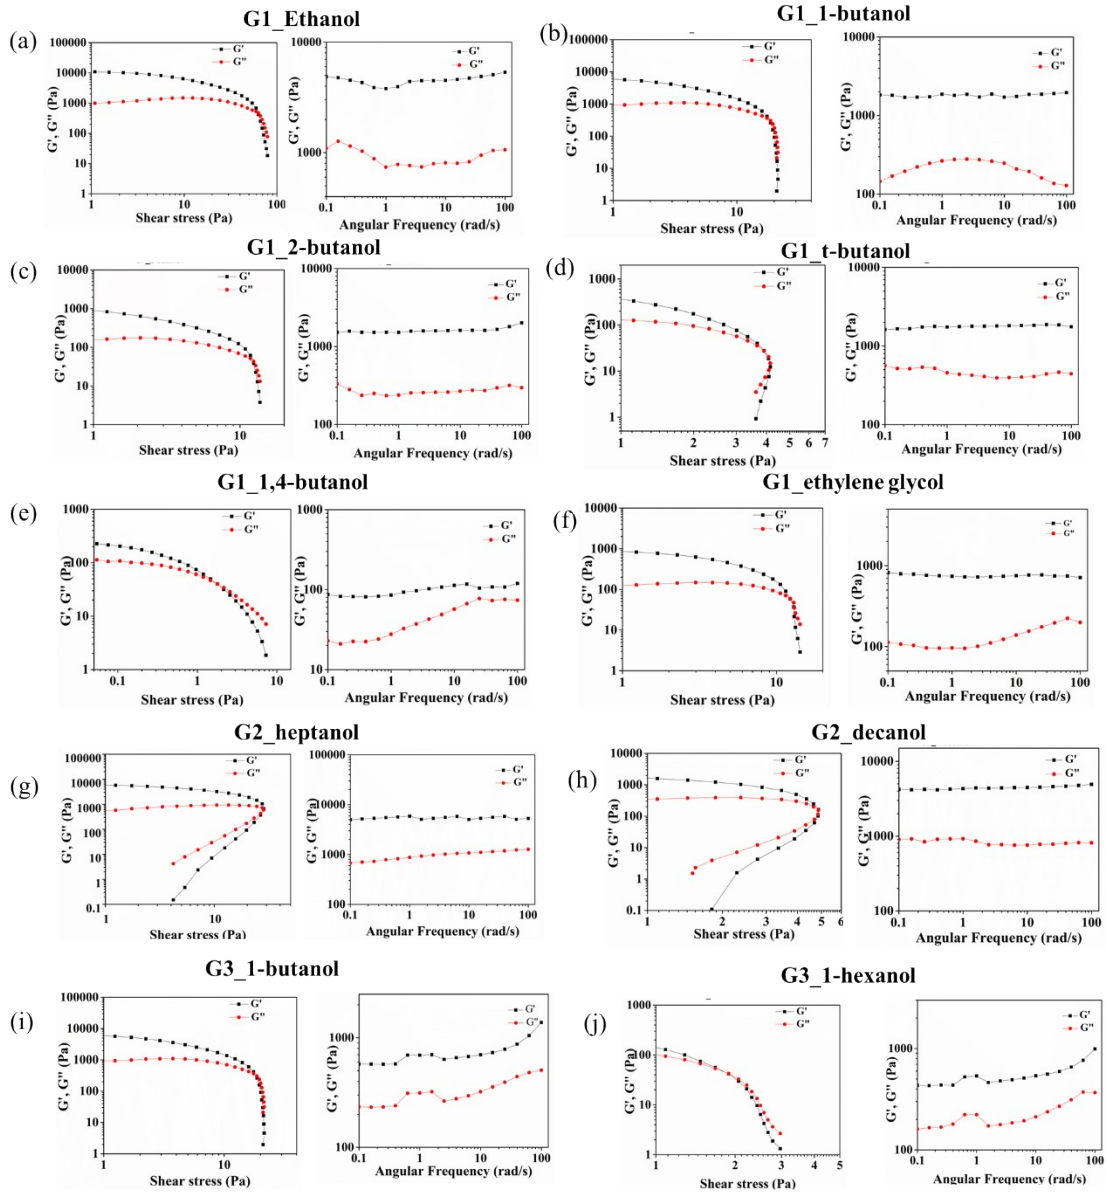

**Fig. S6** Rheological parameters of (a) G1\_ ethanol (b) G1\_1-butanol (c) G1\_2-butanol (d) G1\_ t-butanol (e) G1\_1,4-butanol (f) G1\_ethylene glycol (g) G2\_1-heptanol (h) G2\_1-decanol (i) G3\_1-butanol (j) G3\_1-hexanol

**Table S2.** Rheological data of various gels obtained from different moieties

|                  | <b>G1</b>         |                 | <b>G2</b>         |                 | <b>G3</b>         |                 |
|------------------|-------------------|-----------------|-------------------|-----------------|-------------------|-----------------|
|                  | Yield Stress (Pa) | $G' - G''$ (Pa) | Yield Stress (Pa) | $G' - G''$ (Pa) | Yield Stress (Pa) | $G' - G''$ (Pa) |
| <b>Ethanol</b>   | 63.55             | 3427.96         | -                 | -               | -                 | -               |
| <b>1-butanol</b> | 21.38             | 1606.59         | -                 | -               | 2.84              | 415.72          |
| <b>2-butanol</b> | 12.25             | 1338.98         | -                 | -               | -                 | -               |
| <b>t-butanol</b> | 3.93              | 1299.97         | -                 | -               | -                 | -               |

|                        |       |         |        |         |       |        |
|------------------------|-------|---------|--------|---------|-------|--------|
| <b>1-hexanol</b>       | -     | -       | -      | -       | 1.39  | 583.39 |
| <b>1-heptanol</b>      | -     | -       | 27.86  | 4896.61 | -     | -      |
| <b>1-decanol</b>       | -     | -       | 4.89   | 3592.41 | -     | -      |
| <b>Ethylene glycol</b> | 12.65 | 577.06  | -      | -       | -     | -      |
| <b>1,4-butandiol</b>   | 1.82  | 39.69   | -      | -       | -     | -      |
| <b>cyclohexanol</b>    | 14.55 | 1625.96 | 133.25 | 8584.12 | 11.18 | 959.94 |

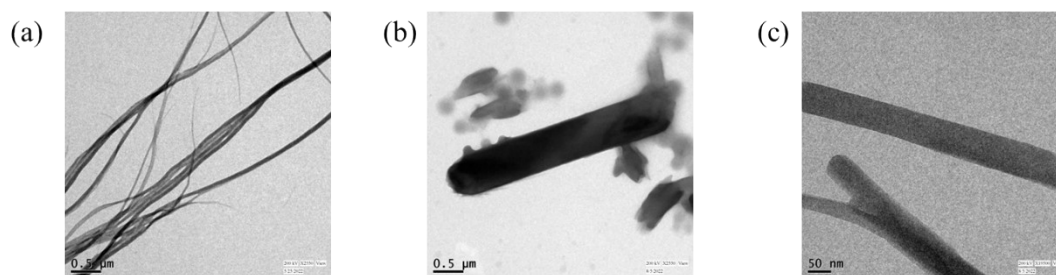

**Fig. S7 .** TEM images of (a) G1\_cyclohexanol (b) G2\_cyclohexanol (c) G3\_cyclohexanol



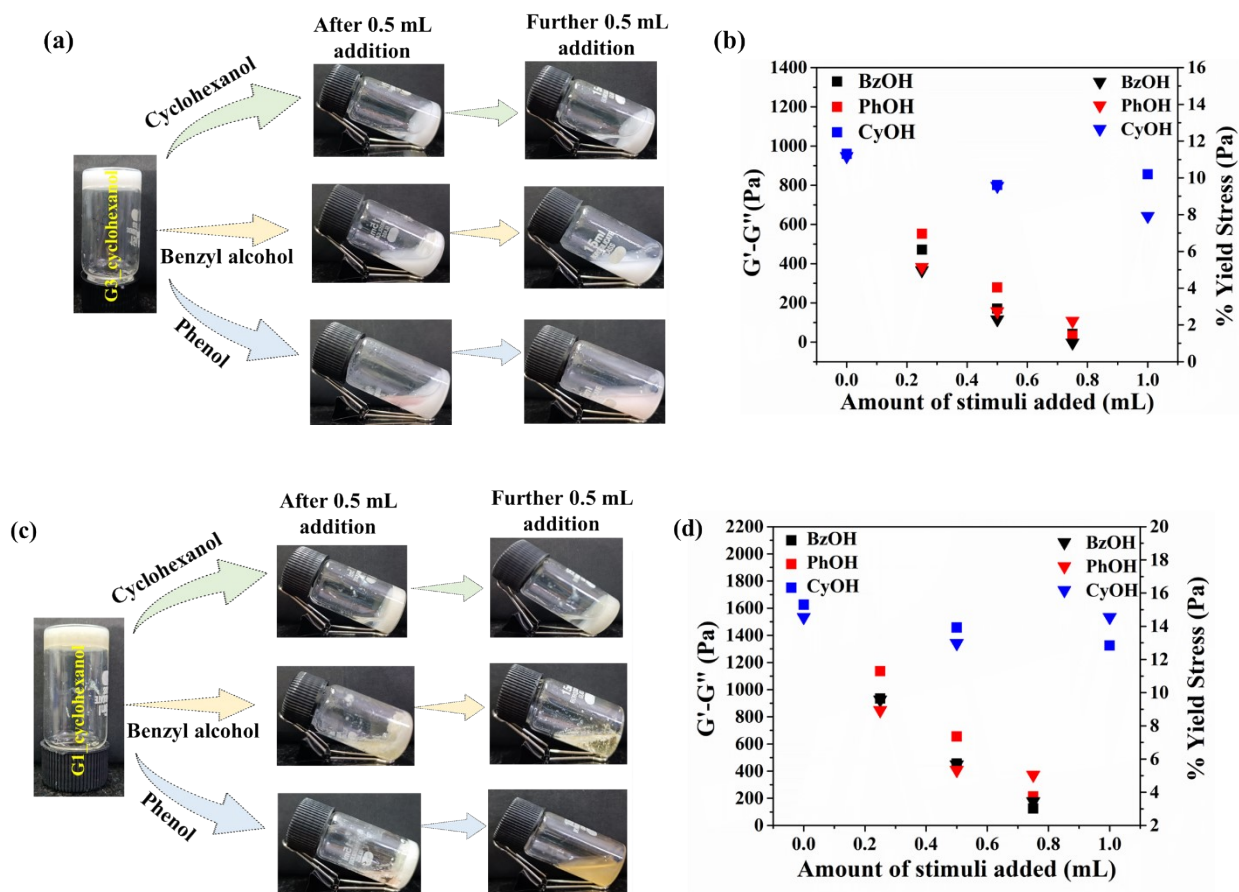

**Fig. S8** (a), (c) Stimuli-responsive behaviour of G1\_cyclohexanol and G3\_cyclohexanol in presence of various stimuli like cyclohexanol, benzyl alcohol and phenol (b), (d) Stepwise rheological parameter correlation diagram of G1\_cyclohexanol and G3\_cyclohexanol gel

**Table S3.** Rheological data at different stages of degelation studies on gel\_cyclohexanol using various chemical stimuli

|                       | Amount of solvent added | G1_cyclohexanol |              | G2_cyclohexanol |              | G3_cyclohexanol |              |
|-----------------------|-------------------------|-----------------|--------------|-----------------|--------------|-----------------|--------------|
|                       |                         | $G' - G''$      | Yield stress | $G' - G''$      | Yield stress | $G' - G''$      | Yield stress |
| <b>Benzyl alcohol</b> | 0 mL                    | 1625.9          | 14.55        | 8584.12         | 133.25       | 959.94          | 11.18        |
|                       | 0.25 mL                 | 934.89          | 9.58         | 2083.52         | 72.61        | 471.46          | 4.97         |
|                       | 0.5 mL                  | 456.34          | 5.67         | 1607.07         | 33.92        | 170.29          | 2.30         |
|                       | 0.75 mL                 | 124.8           | 3.45         | 498.43          | 12.40        | 42.04           | 1.03         |
| <b>Phenol</b>         | 0 mL                    | 1625.96         | 14.55        | 8584.12         | 133.25       | 959.94          | 11.18        |
|                       | 0.25 mL                 | 1136.78         | 8.94         | 3376.16         | 90.34        | 552.9           | 5.15         |
|                       | 0.5 mL                  | 654.98          | 5.34         | 3147.22         | 61.56        | 278.79          | 2.74         |
|                       | 0.75 mL                 | 213.9           | 5.05         | 1301.96         | 59.68        | 31.98           | 2.22         |

|                     |        |         |       |         |        |        |       |
|---------------------|--------|---------|-------|---------|--------|--------|-------|
| <b>Cyclohexanol</b> | 0 mL   | 1625.96 | 14.55 | 8584.12 | 133.25 | 959.94 | 11.18 |
|                     | 0.5 mL | 1456.78 | 12.98 | 7659.24 | 111.12 | 801.25 | 9.56  |
|                     | 1 mL   | 1324.87 | 14.55 | 7821.46 | 125.06 | 856.12 | 7.92  |

**Table S4.**  
parameters for gelator G2

Crystallographic

| <b>CCDC 2323438</b>           |                                                               |
|-------------------------------|---------------------------------------------------------------|
| Formula                       | C <sub>42</sub> H <sub>33</sub> N <sub>3</sub> O <sub>3</sub> |
| Crystal System                | Monoclinic                                                    |
| MW                            | 627.71                                                        |
| Temperature (K)               | 296(2)                                                        |
| a (Å)                         | 23.719(3)                                                     |
| b (Å)                         | 5.8937(7)                                                     |
| c (Å)                         | 26.041(3)                                                     |
| α (°)                         | 90                                                            |
| β (°)                         | 117.009(3)                                                    |
| γ (°)                         | 90                                                            |
| Cell Volume (Å <sup>3</sup> ) | 3243.31                                                       |
| Space Group                   | P2 <sub>1</sub> /n                                            |
| d (g/cm <sup>3</sup> )        | 1.285                                                         |
| Z                             | 4                                                             |
| R-factor                      | 5.6                                                           |

**Table S5.** Angle between the planes

| <b>Planes</b> | <b>Interplaner Angles</b> |
|---------------|---------------------------|
| AB            | 87°                       |
| AC            | 79°                       |
| AD            | 44°                       |

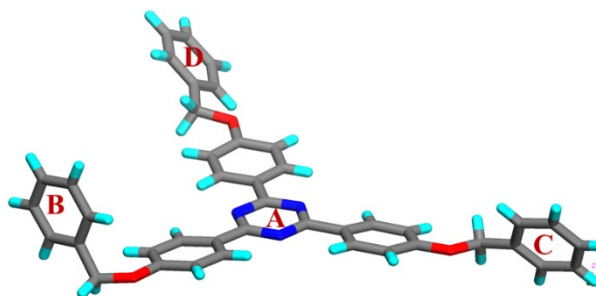

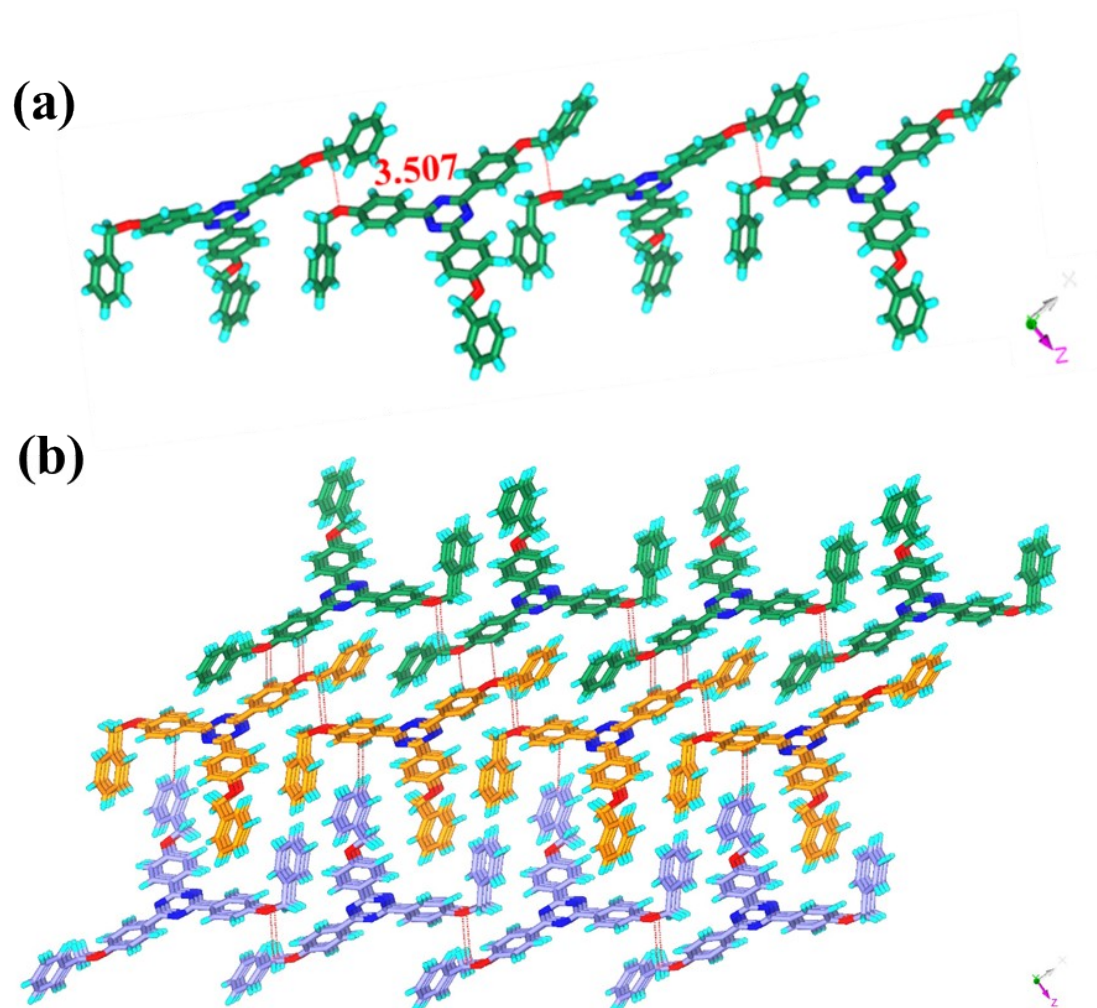

**Fig. S9.** (a) 1D chain along x-axis propagating *via* H-bonding interactions (b) Overall 3D view of **G2**

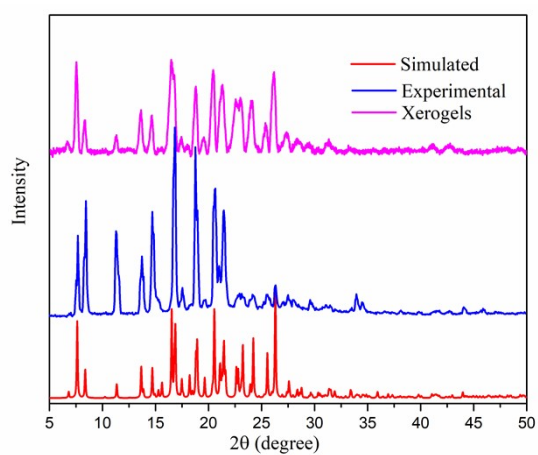

**Fig. S10.** PXRD of crystal of **G2** and xerogels from **G2\_cyclohexanol**

## REFERENCES

1. Samanta, J.; Natarajan, R. *Org. Lett.* **2016**, *18*, 14, 3394–3397.
2. Kotha, S.; Solanke, B. U.; Gupta, N.K. *J.Mol.Struct.* **2021**, *1244*,130907.
